# Supplementary material
Source: PubMed Central journal article supplement (PMC6932631)
Supplement: NIHMS1062352-supplement-1.pdf [file NIHMS1062352-supplement-1.pdf]

**Supplemental Table 1**

| <b>Primer</b>              | <b>Sequence</b>                                                                              |
|----------------------------|----------------------------------------------------------------------------------------------|
| WASF2-QF                   | CAACATCACCCCTGGCAAATG                                                                        |
| WASF2-QR                   | CCCGAGAGGCAAAGGTATTT                                                                         |
| HDAC1-QF                   | GCTGGCAAAGGCAAGTATTATG                                                                       |
| HDAC1-QR                   | CTAGGCTGGAACATCTCCATTAC                                                                      |
| AGO3-QF                    | AGCTCCATGAATGGAAATCGG                                                                        |
| AGO3-QR                    | GCCAGCAGTTTAATGGGTTTG                                                                        |
| RBBP5-QF                   | GACAACTGGAACAAGCAATACC                                                                       |
| RBBP5-QR                   | G TTCAGGCTCTCCATCTCTTC                                                                       |
| MOV10-QF                   | GCTTCTTCAGGGAACAAGTATCT                                                                      |
| MOV10-QR                   | CGCAGCTTCACCTCATAGTT                                                                         |
| AGO3-1-NheI-F              | CGCCGGGCAAGCCAGGCA                                                                           |
| AGO3-1-HindIII-R           | CCCAAGCTTGACGCGACGGGCACTCTCACT                                                               |
| AGO3-2-NheI-F              | CTAGCTAGCGGCACTACCACATGGTTGAA                                                                |
| AGO3-2-HindIII-R           | CCCAAGCTTG TAGGTAGTGTTACATTAAGTTTCACC                                                        |
| HDAC1-NheI-F               | CTAGCTAGCGTTAGATTGTAATTTCTTGAAGCCTGAAT                                                       |
| HDAC1-HindIII-R            | CCCAAGCTTAACAGAATGGACTTACATCTCTGC                                                            |
| MOV10-NheI-F               | CTAGCTAGCCTGCCTGGCCCCAGCTTCCT                                                                |
| MOV10-HindIII-R            | CCCAAGCTTCCTGGCCCCCTGTCTACAAAGCA                                                             |
| WASF2-NheI-F               | CTAGCTAGCCGGGTGTTGATTCCTTGCAG                                                                |
| WASF2-HindIII-R            | CCCAAGCTTAAGTACTTGGAAGATTCATTCCTCCTA                                                         |
| RBBP5-NheI-F               | CTAGCTTTGCTGAGGTACAACAATGTTATCGTCACTAGGGACTTTA<br>AATAGCGCGACAATTTAAGATTATTTGCTCCGGGAACATA   |
| RBBP5-HindIII-R            | AGCTTATGTTCCCGGAGCAAATAATCTTAAATTGTCGCGCTATTTA<br>AAGTCCCTAGTGACGATAACATTGTTGTACCTCAGCAAAG   |
| Rs4521516-ref(G)-NheI-F    | CTAGCCCAGCAAGAAAGCATT CAGAATAATGAGTTACAAAGAAGA<br>GACATAAATCGAAAAACTGAAAGTGTAAAGTTGGGGTGAGA  |
| Rs4521516-ref(G)-HindIII-R | AGCTTCTCACCCCAACCTTACACTTTCAGTTTTTCGATTTATGTCTC<br>TTCTTTGTAACCTCATTATTCTGAATGCTTTCTTGCTGGG  |
| Rs4521516-Alt(C)-NheI-F    | CTAGCCCAGCAAGAAAGCATT CAGAATAATGAGTTACAAAGAAGA<br>CACATAAATCGAAAAACTGAAAGTGTAAAGTTGGGGTGAGA  |
| Rs4521516-Alt(C)-HindIII-R | AGCTTCTCACCCCAACCTTACACTTTCAGTTTTTCGATTTATGTGTC<br>TTCTTTGTAACCTCATTATTCTGAATGCTTTCTTGCTGGG  |
| Rs200234178-Ref-NheI-F     | CTAGCGGGCTGTATCTATTAACCATCATGCCAGTTTGTTTGTTTGT<br>TTATTTATTTATTTATTTATTTATTTATTTAGAGACTGTA   |
| Rs200234178-Ref-HindIII-R  | AGCTTACAGTCTCTAAATAAATAAATAAATAAATAAATAAATAAACA<br>AACAAACAAACTGGCATGATGGTTAATAGATACAGCCCCG  |
| Rs200234178-Alt-NheI-F     | CTAGCGGGCTGTATCTATTAACCATCATGCCAGTTTGTTTGTTTAT<br>TTATTTATTTATTTATTTATTTAGAGACTGTA           |
| Rs200234178-Alt-HindIII-R  | AGCTTACAGTCTCTAAATAAATAAATAAATAAATAAATAAATAAACA<br>AACTGGCATGATGGTTAATAGATACAGCCCCG          |
| Rs34845073-Ref-NheI-F      | CTAGCCTGGAGGGCCGTGAACACCATACTTTGCACATACACTTAA<br>TAAATACTTGTGGAAAAGAAAAAATAATCAATTCGTTGACCTA |

|                          |                                                                                             |
|--------------------------|---------------------------------------------------------------------------------------------|
| Rs34845073-Ref-HindIII-R | AGCTTAGGTCAACGAATTGATTTTTTTTTTCTTTCCACAAGTATTT<br>ATTAAGTGTATGTGCAAAGTATGGTGTTACGGCCCTCCAGG |
| Rs34845073-Alt-NheI-F    | CTAGCCTGGAGGGCCGTGAACACCATACTTTGCACATACACTTAA<br>ATACTTGTGGAAAAGAAAAAAAAAATCAATTCGTTGACCTA  |
| Rs34845073-Alt-HindIII-R | AGCTTAGGTCAACGAATTGATTTTTTTTTTCTTTCCACAAGTATTT<br>AAGTGTATGTGCAAAGTATGGTGTTACGGCCCTCCAGG    |

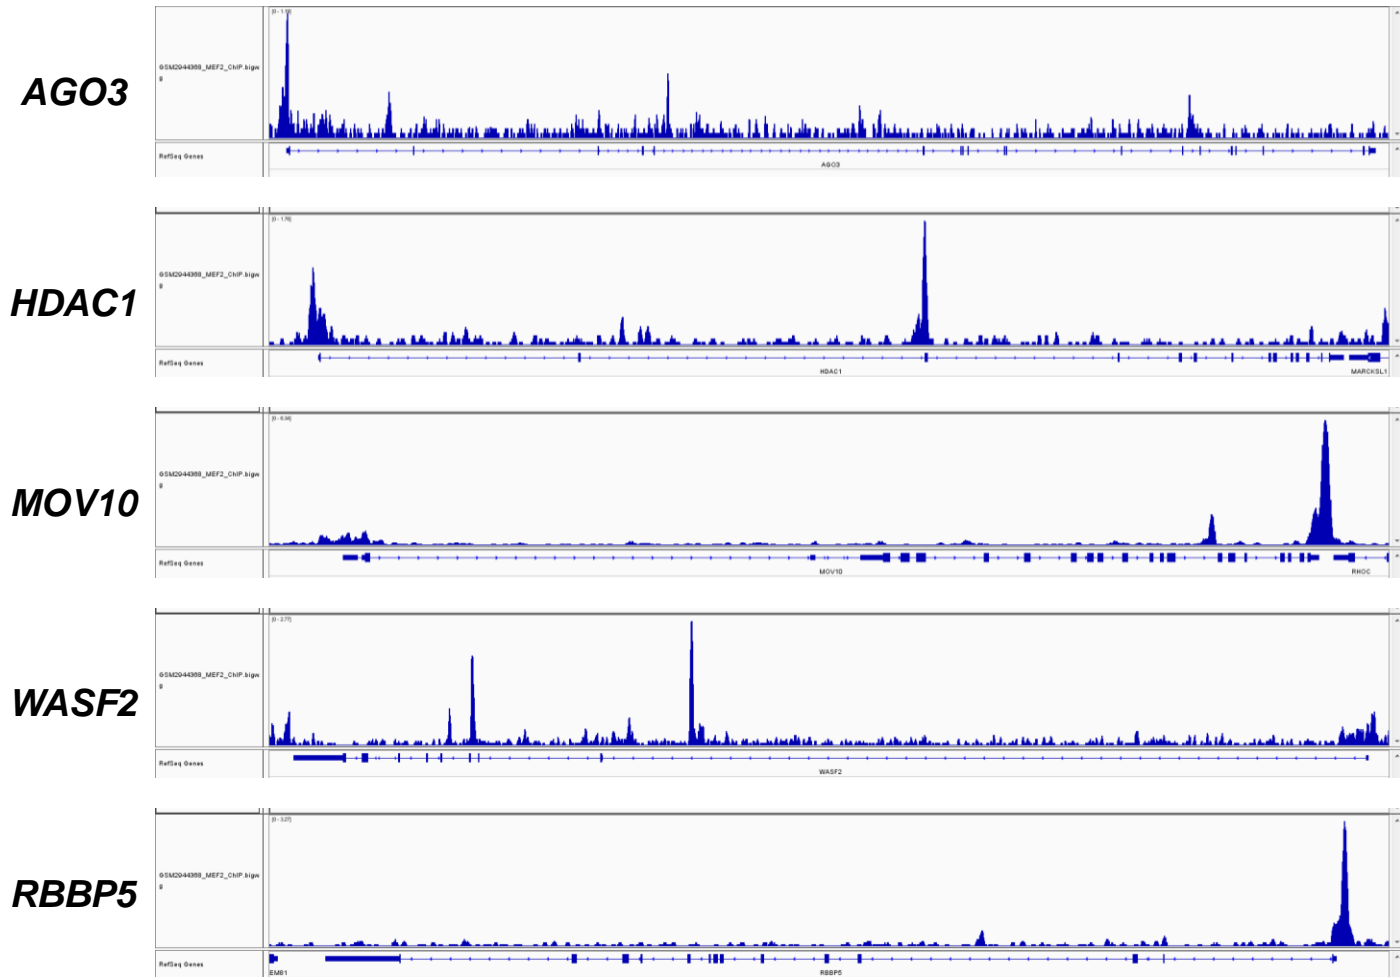

**Supplementary Fig. S1. MEF2C CHIP-Seq Peaks in MOLM13 cells.** MEF2C ChIP-Seq data (NCBI Geo: GSM2944368) was visualized on the IGV browser (<http://software.broadinstitute.org/software/igv/>). Peaks are observed in the same locations as in the ENCODE MEF2C ChIP-Seq data obtained in the GM12878 lymphoblastoid cell line.
